# Supplementary material for: Rats show direct reciprocity when interacting with multiple partners
Source: PubMed Central journal article supplement (PMC7864983; doi:10.1038/s41598-021-82526-4), 2021-02-05

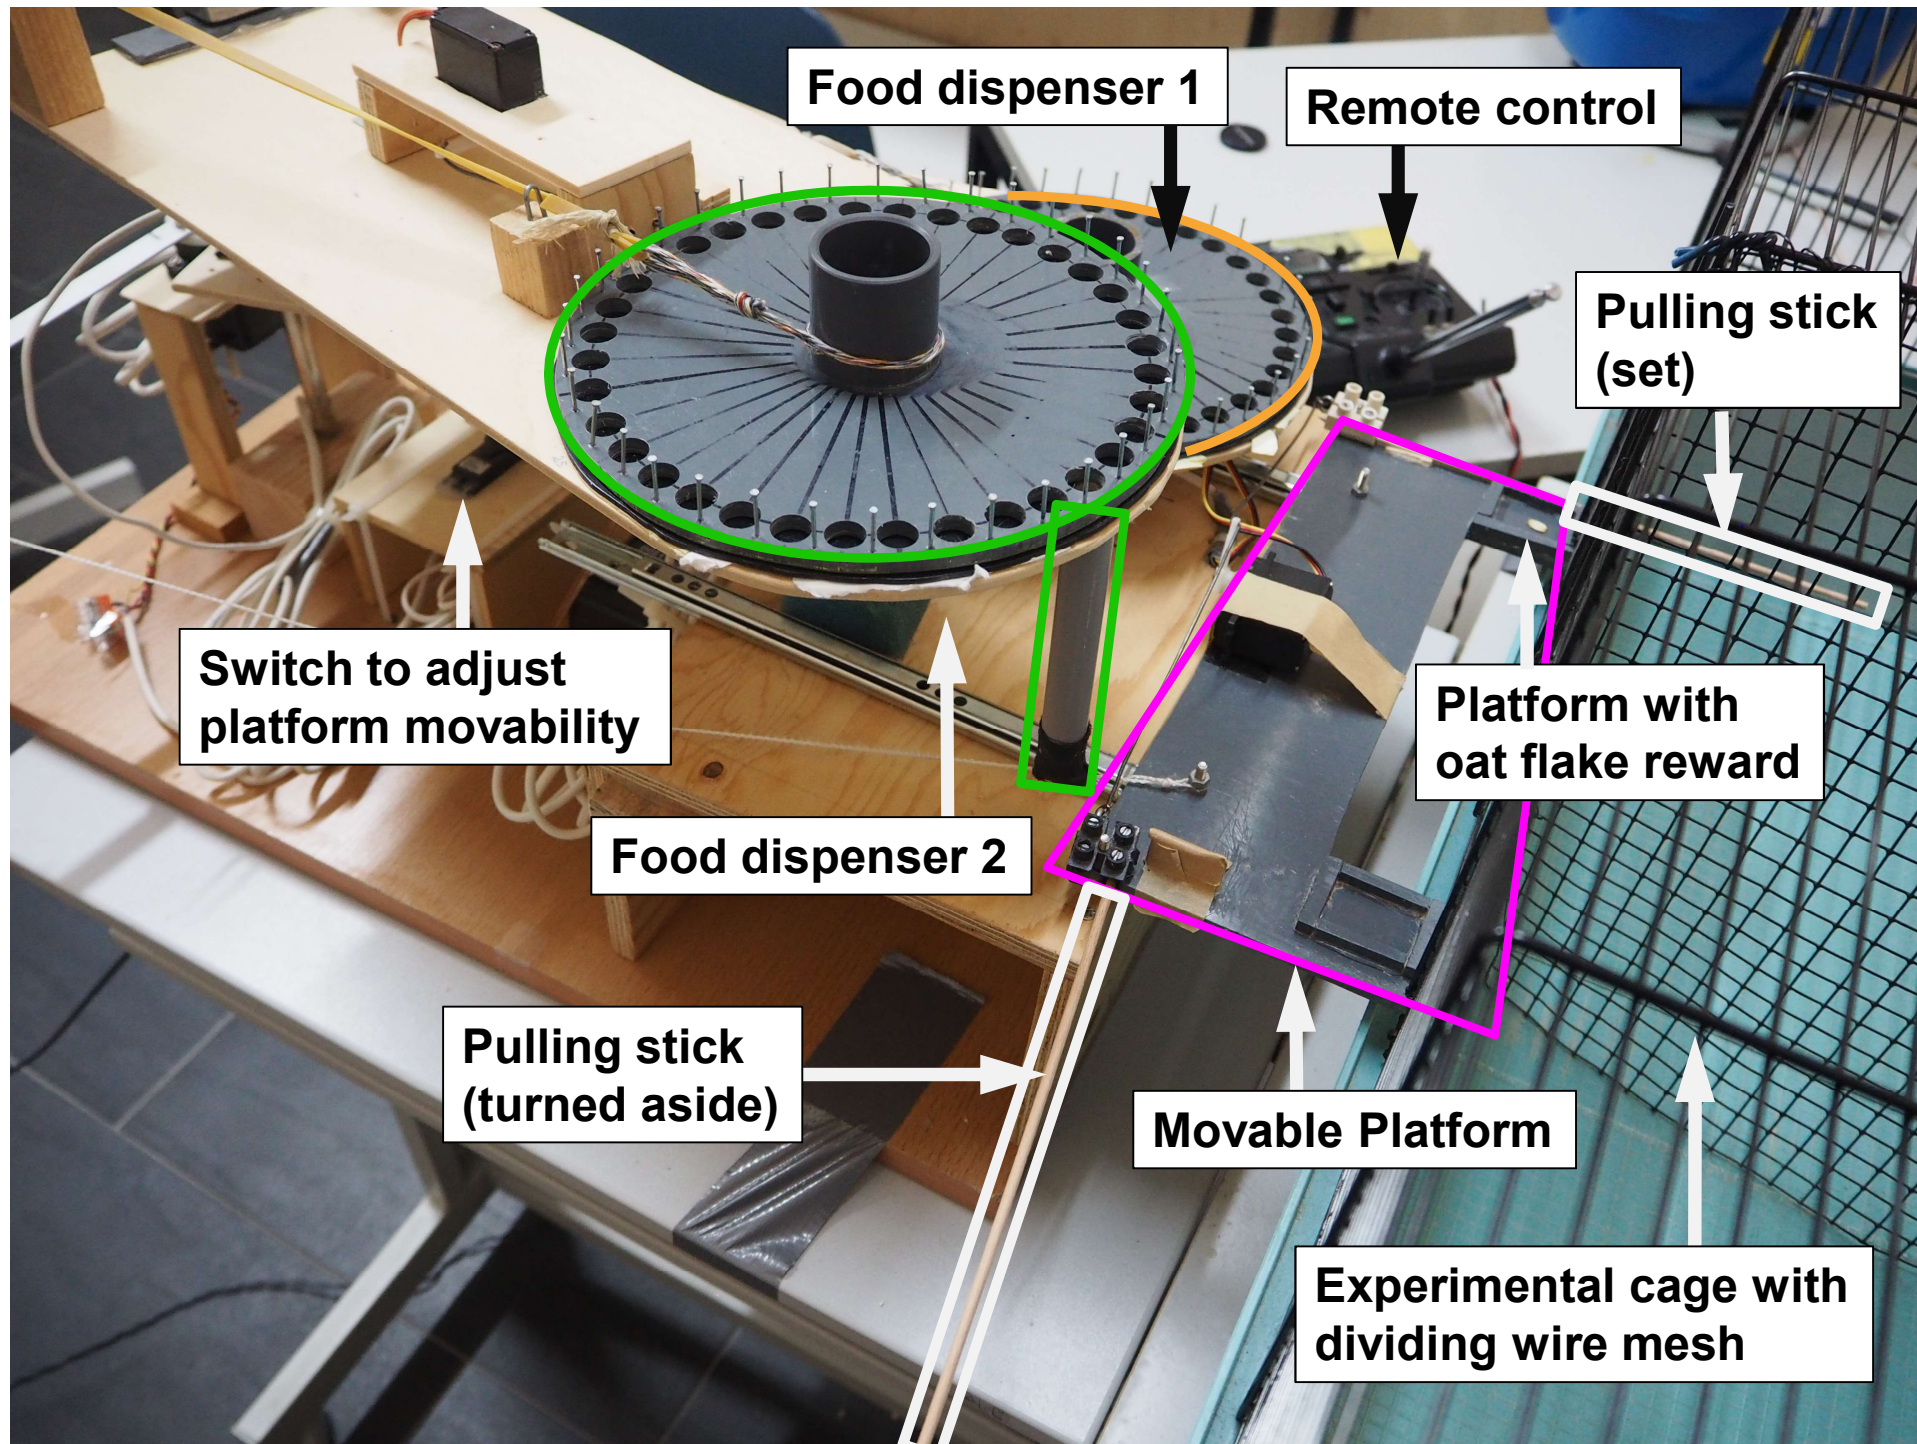

Supplement: 41598_2021_82526_MOESM1_ESM.pdf [file 41598_2021_82526_MOESM1_ESM.pdf]
